# Supplementary material for: Integrin α10, a Novel Therapeutic Target in Glioblastoma, Regulates Cell Migration, Proliferation, and Survival
Source: PubMed Central journal article supplement (PMC6521287; doi:10.3390/cancers11040587), 2019-04-25

## Supplementary Materials: Integrin $\alpha 10$ , a Novel Therapeutic Target in Glioblastoma, Regulates Cell Migration, Proliferation, and Survival

Matilda Munksgaard Thorén, Katarzyna Chmielarska Masoumi, Cecilia Krona, Xiaoli Huang, Soumi Kundu, Linnéa Schmidt, Karin Forsberg-Nilsson, Marcus Floyd Keep, Elisabet Englund, Sven Nelander, Bo Holmqvist and Evy Lundgren-Åkerlund

**Table S1.** The 8 genes involved in migration and/or invasion among the top 20 genes up-regulated in the  $\alpha 10^{\text{high}}$  expressing U3071MG, U3078MG and U3054MG cells according to microarray analysis. Log fold changes and *p*-values are shown.

| No. | Gene Symbol | Gene Description                                                   | Log Fold sChange | <i>p</i> -Value | Ref.  |
|-----|-------------|--------------------------------------------------------------------|------------------|-----------------|-------|
| 2   | CAPN6       | calpain 6                                                          | 1.55             | 0.023           | [1]   |
| 4   | MGP         | matrix Gla protein                                                 | 1.19             | 0.012           | [2,3] |
| 10  | PDGFD       | platelet derived growth factor D                                   | 1.00             | 0.002           | [4]   |
| 11  | ANGPT1      | angiopoietin 1                                                     | 0.97             | 0.0004          | [5]   |
| 12  | TRPV4       | transient receptor potential cation channel, subfamily V, member 4 | 0.96             | 0.001           | [6–8] |
| 15  | SPP1        | secreted phosphoprotein 1                                          | 0.86             | 0.022           | [9]   |
| 16  | SERPINI1    | serpin peptidase inhibitor, clade I (neuroserpin), member 1        | 0.84             | 0.009           | [10]  |
| 18  | SCIN        | scinderin                                                          | 0.82             | 0.027           | [11]  |

**Table S2.** The table showing the relevant information pertaining to the primary antibodies used in the context of flow cytometry and immunolabeling.

| Epitope              | Conjugate       | Manufacturer                       | Species; Monoclonal or Polyclonal |
|----------------------|-----------------|------------------------------------|-----------------------------------|
| Integrin $\alpha 3$  |                 | LS-B13291, LSBio                   | Mouse; monoclonal                 |
| Integrin $\alpha 6$  |                 | MAB1378, Millipore                 | Rat; monoclonal                   |
| Integrin $\alpha 7$  |                 | LS-B11231, LSBio                   | Mouse; monoclonal                 |
| Integrin $\alpha 10$ | Alexa Fluor 647 | Xintela AB                         | Mouse; monoclonal                 |
| Integrin $\alpha 10$ | PE              | Xintela AB                         | Mouse; monoclonal                 |
| Integrin $\alpha 10$ |                 | Xintela AB                         | Rabbit; polyclonal                |
| GFAP                 |                 | ab53554, Abcam                     | Goat; polyclonal                  |
| Nestin               |                 | MAB5326 Chemicon®, Merck Millipore | Mouse; monoclonal                 |
| NG2                  |                 | ab20156, Abcam                     | Mouse; monoclonal                 |
| NuMA                 |                 | ab97585, Abcam                     | Rabbit; polyclonal                |
| Saporin              |                 | ab18791, Abcam                     | Goat; polyclonal                  |
| Sox2                 |                 | ab110145, Abcam                    | Goat; polyclonal                  |

**Table S3.** List of secondary antibodies used in the context of flow cytometry and immunolabeling.

| Secondary Antibodies                                                                                              | Manufacturer                                      |
|-------------------------------------------------------------------------------------------------------------------|---------------------------------------------------|
| Rhodamine Red™-X-AffiniPure F(ab') <sub>2</sub> Fragment Donkey Anti-Rat IgG (H+L) (cat.no. 711-296-153)          | Jackson ImmunoResearch Inc. (West Grove, PA, USA) |
| Rhodamine Red™-X (RRX) AffiniPure F(ab') <sub>2</sub> Fragment Donkey Anti-Rabbit IgG (H+L) (cat.no. 711-296-152) | Jackson ImmunoResearch Inc. (West Grove, PA, USA) |
| Alexa Fluor® 488 AffiniPure F(ab') <sub>2</sub> Fragment Donkey Anti-Mouse IgG (H+L) (cat.no. 715-546-150)        | Jackson ImmunoResearch Inc. (West Grove, PA, USA) |
| Alexa Fluor® 647 AffiniPure F(ab') <sub>2</sub> Fragment Donkey Anti-Mouse IgG (H+L) (cat. no.715-606-150)        | Jackson ImmunoResearch Inc. (West Grove, PA, USA) |
| Alexa Fluor® 647 AffiniPure F(ab') <sub>2</sub> Fragment Donkey Anti-Goat IgG (H+L) (cat.no. 705-606-147)         | Jackson ImmunoResearch Inc. (West Grove, PA, USA) |
| PE Goat Anti-Mouse Ig ( Multiple Adsorption) (cat .no. 550599)                                                    | BD Pharmingen                                     |

**Table S4.** TaqMan primers used in the qPCR analysis.

| Gene   | Manufacturer             | Primer Name   |
|--------|--------------------------|---------------|
| CAPN6  | Thermo Fisher Scientific | Hs00560073_m1 |
| GAPDH  | Thermo Fisher Scientific | Hs02758991_g1 |
| ITGA3  | Thermo Fisher Scientific | Hs01076879_m1 |
| ITGA6  | Thermo Fisher Scientific | Hs01041011_m1 |
| ITGA7  | Thermo Fisher Scientific | Hs01056475_m1 |
| ITGA10 | Thermo Fisher Scientific | Hs00174623_m1 |
| MGP    | Thermo Fisher Scientific | Hs00969490_m1 |

## References

- Leloup, L.; Wells, A. Calpains as potential anti-cancer targets. *Expert Opin Ther Targets* **2011**, *15*, 309–323, doi:10.1517/14728222.2011.553611.
- Fu, M.H.; Wang, C.Y.; Hsieh, Y.T.; Fang, K.M.; Tzeng, S.F. Functional Role of Matrix gla Protein in Glioma Cell Migration. *Mol Neurobiol* **2018**, *55*, 4624–4636, doi:10.1007/s12035-017-0677-1.
- Mertsch, S.; Schurgers, L.J.; Weber, K.; Paulus, W.; Senner, V. Matrix gla protein (MGP): an overexpressed and migration-promoting mesenchymal component in glioblastoma. *BMC Cancer* **2009**, *9*, 302, doi:10.1186/1471-2407-9-302.
- Chen, J.; Yuan, W.; Wu, L.; Tang, Q.; Xia, Q.; Ji, J.; Liu, Z.; Ma, Z.; Zhou, Z.; Cheng, Y., et al. PDGF-D promotes cell growth, aggressiveness, angiogenesis and EMT transformation of colorectal cancer by activation of Notch1/Twist1 pathway. *Oncotarget* **2017**, *8*, 9961–9973, doi:10.18632/oncotarget.14283.
- Abdel-Malak, N.A.; Srikant, C.B.; Kristof, A.S.; Magder, S.A.; Di Battista, J.A.; Hussain, S.N. Angiopoietin-1 promotes endothelial cell proliferation and migration through AP-1-dependent autocrine production of interleukin-8. *Blood* **2008**, *111*, 4145–4154, doi:10.1182/blood-2007-08-110338.
- Fiorio Pla, A.; Ong, H.L.; Cheng, K.T.; Brossa, A.; Bussolati, B.; Lockwich, T.; Paria, B.; Munaron, L.; Ambudkar, I.S. TRPV4 mediates tumor-derived endothelial cell migration via arachidonic acid-activated actin remodeling. *Oncogene* **2012**, *31*, 200–212, doi:10.1038/onc.2011.231.
- Lee, W.H.; Choong, L.Y.; Jin, T.H.; Mon, N.N.; Chong, S.; Liew, C.S.; Putti, T.; Lu, S.Y.; Harteneck, C.; Lim, Y.P. TRPV4 plays a role in breast cancer cell migration via Ca(2+)-dependent activation of AKT and downregulation of E-cadherin cell cortex protein. *Oncogenesis* **2017**, *6*, e338, doi:10.1038/oncsis.2017.39.
- Wen, L.; Wen, Y.C.; Ke, G.J.; Sun, S.Q.; Dong, K.; Wang, L.; Liao, R.F. TRPV4 regulates migration and tube formation of human retinal capillary endothelial cells. *BMC Ophthalmol* **2018**, *18*, 38, doi:10.1186/s12886-018-0697-2.
- Kim, J.; Erikson, D.W.; Burghardt, R.C.; Spencer, T.E.; Wu, G.; Bayless, K.J.; Johnson, G.A.; Bazer, F.W. Secreted phosphoprotein 1 binds integrins to initiate multiple cell signaling pathways, including FRAP1/mTOR, to support attachment and force-generated migration of trophectoderm cells. *Matrix Biol* **2010**, *29*, 369–382, doi:10.1016/j.matbio.2010.04.001.
- Matsuda, Y.; Miura, K.; Yamane, J.; Shima, H.; Fujibuchi, W.; Ishida, K.; Fujishima, F.; Ohnuma, S.; Sasaki, H.; Nagao, M., et al. SERPIN11 regulates epithelial-mesenchymal transition in an orthotopic implantation model of colorectal cancer. *Cancer Sci* **2016**, *107*, 619–628, doi:10.1111/cas.12909.
- Liu, J.J.; Liu, J.Y.; Chen, J.; Wu, Y.X.; Yan, P.; Ji, C.D.; Wang, Y.X.; Xiang, D.F.; Zhang, X.; Zhang, P., et al. Scinderin promotes the invasion and metastasis of gastric cancer cells and predicts the outcome of patients. *Cancer Lett* **2016**, *376*, 110–117, doi:10.1016/j.canlet.2016.03.035.

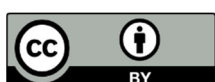

Supplement: cancers-11-00587-s001.pdf [file cancers-11-00587-s001.pdf]
